# Supplementary material
Source: Royal Society of Chemistry journal article supplement (doi:10.1039/d6sm00301j)
Supplement: d6sm00301j3.pdf [file d6sm00301j3.pdf]

## Supplementary Information

# Chemically triggered rapid degradation of tetra-PEG gels cross-linked with a diacylhydrazine-containing cross-linker

*Satsuki Sekiguchi, Takamasa Sakai, Kousuke Tsuchiya\**

<sup>1</sup> Department of Chemistry and Biotechnology, Graduate School of Engineering, The University of Tokyo, 7-3-1 Hongo, Bunkyo-ku, Tokyo 113-8656, Japan.

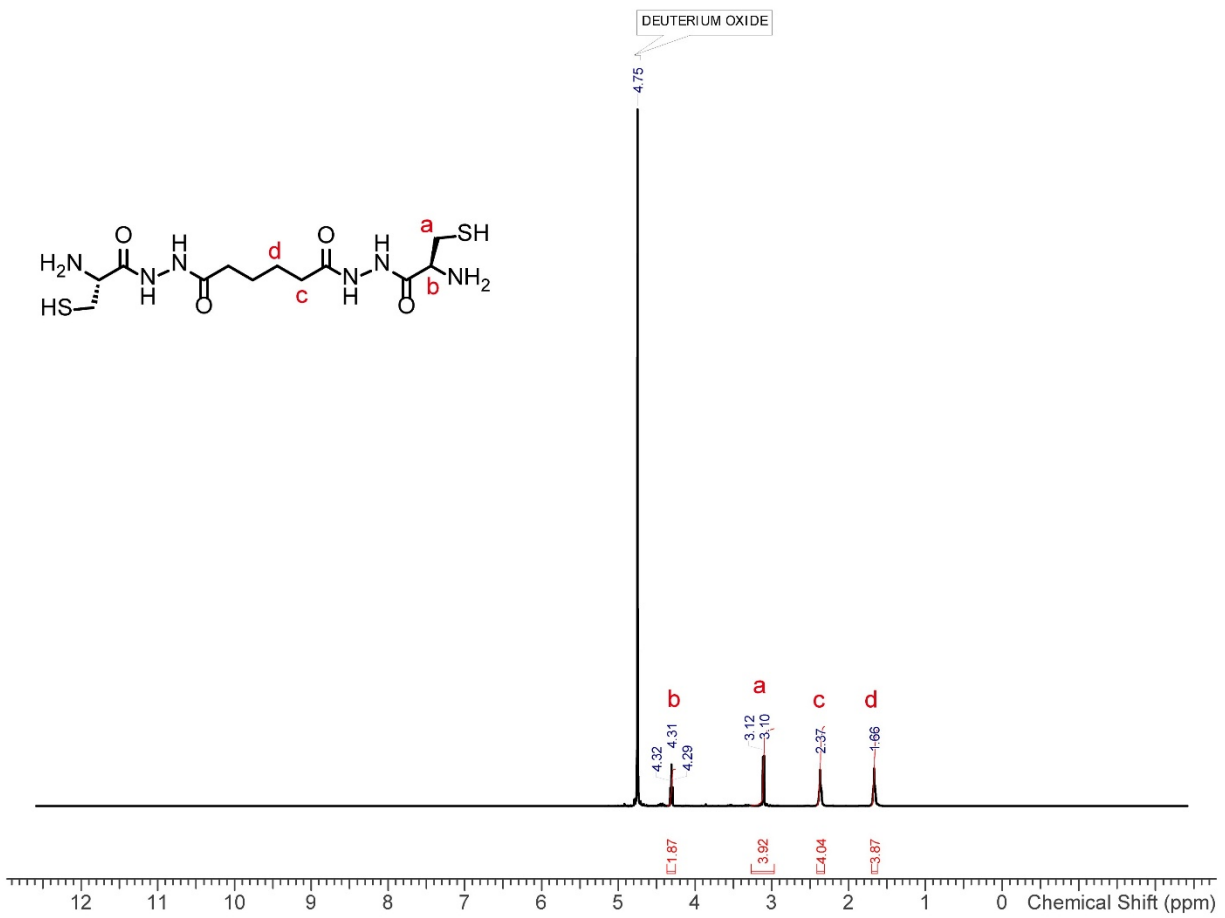

**Figure S1.**  $^1\text{H}$  NMR spectrum of DCH in  $\text{D}_2\text{O}$ .

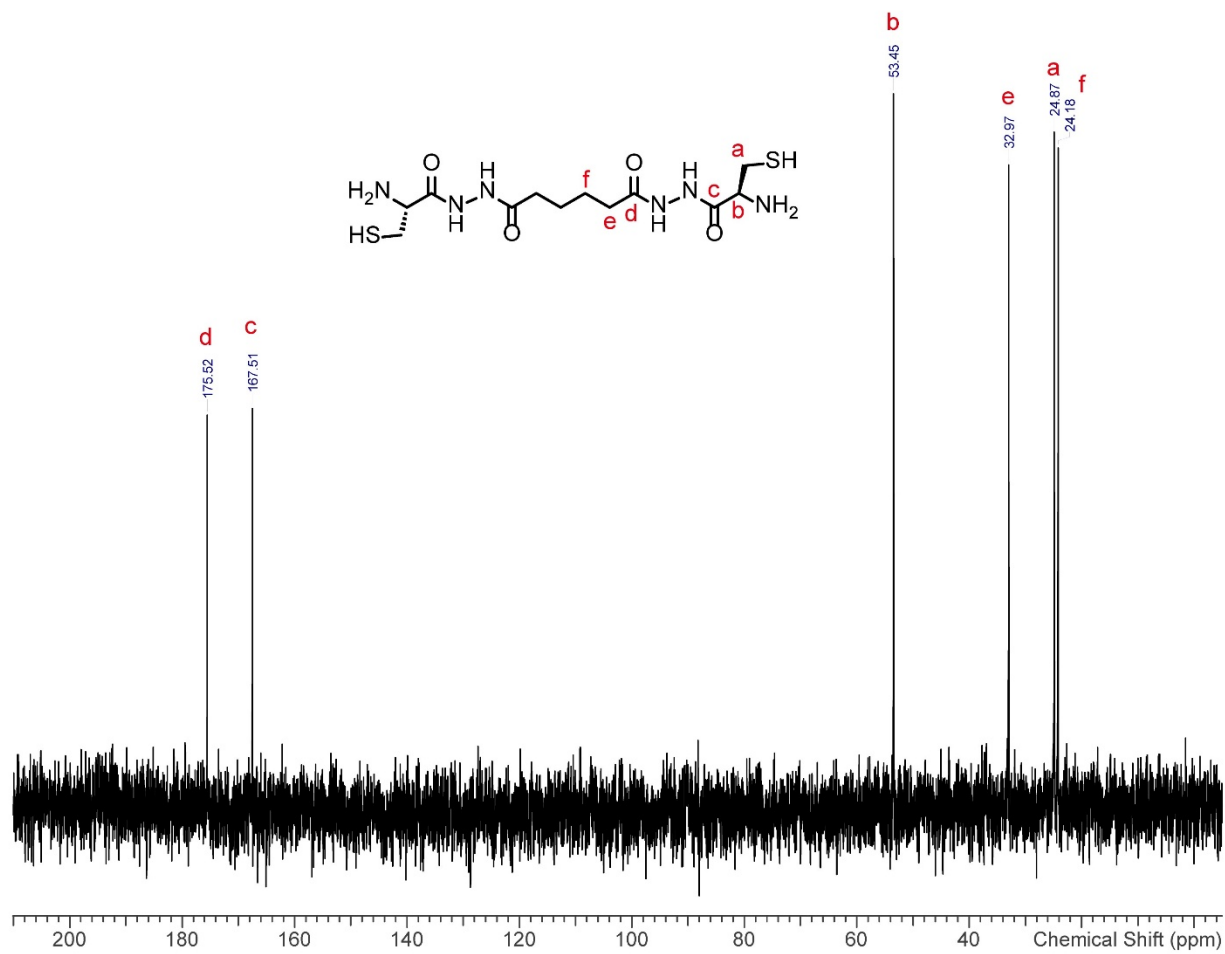

**Figure S2.** <sup>13</sup>C NMR spectrum of DCH in D<sub>2</sub>O.

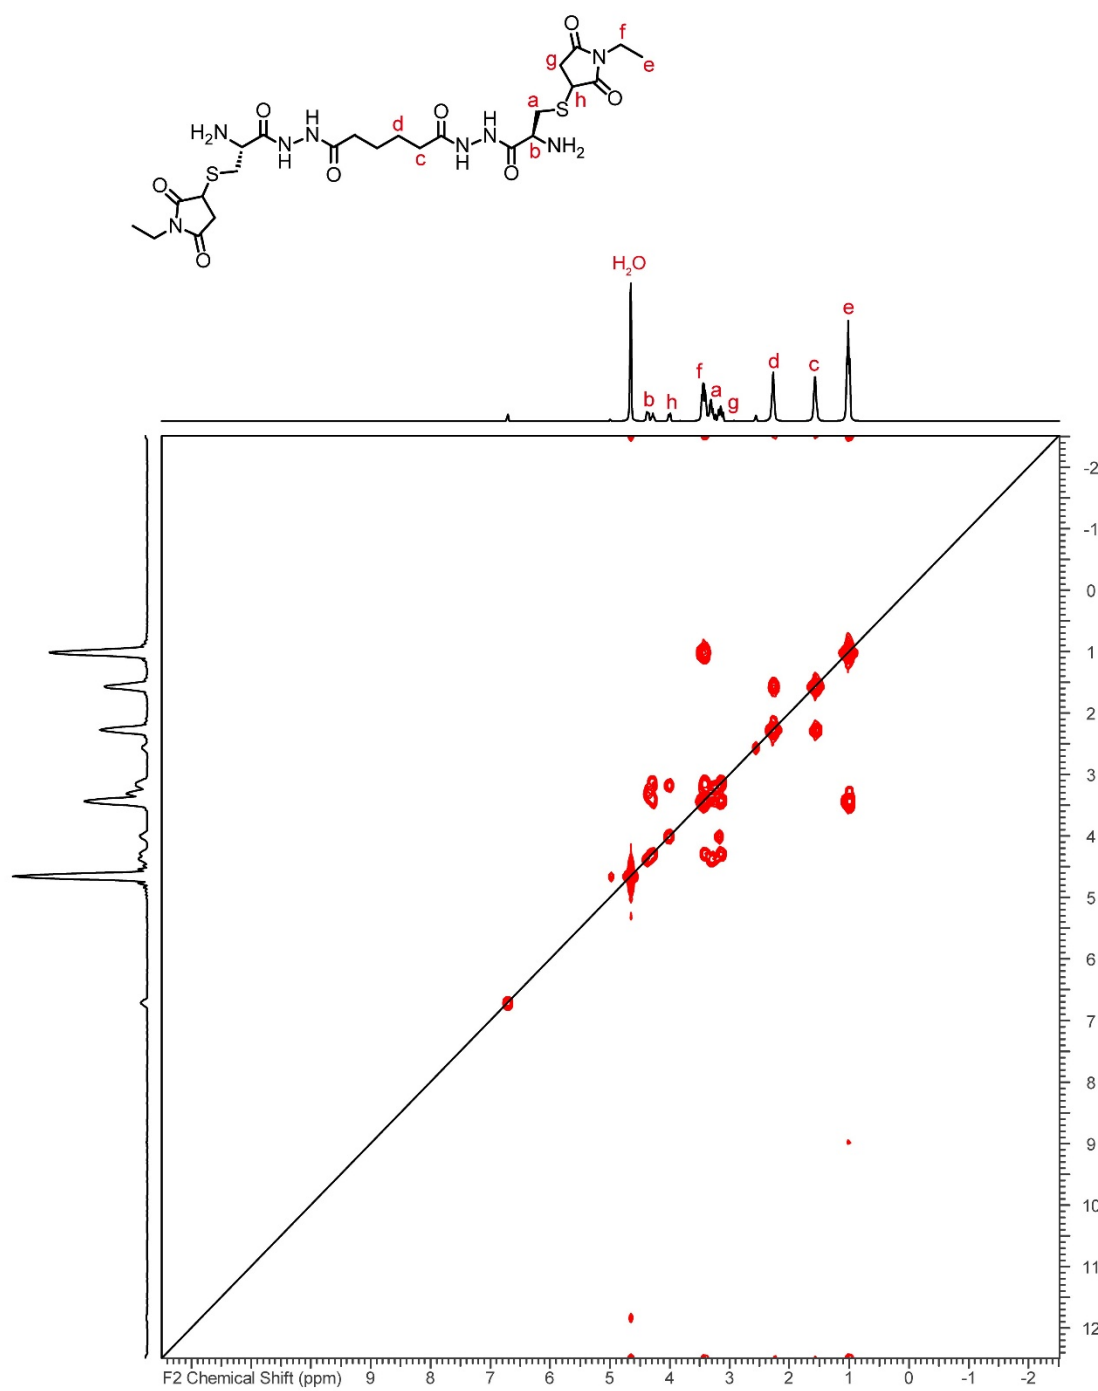

**Figure S3.**  $^1\text{H}$ - $^1\text{H}$  COSY NMR spectrum of the product in  $\text{D}_2\text{O}$  for the model reaction between the cross-linker DCH and *N*-ethylmaleimide.

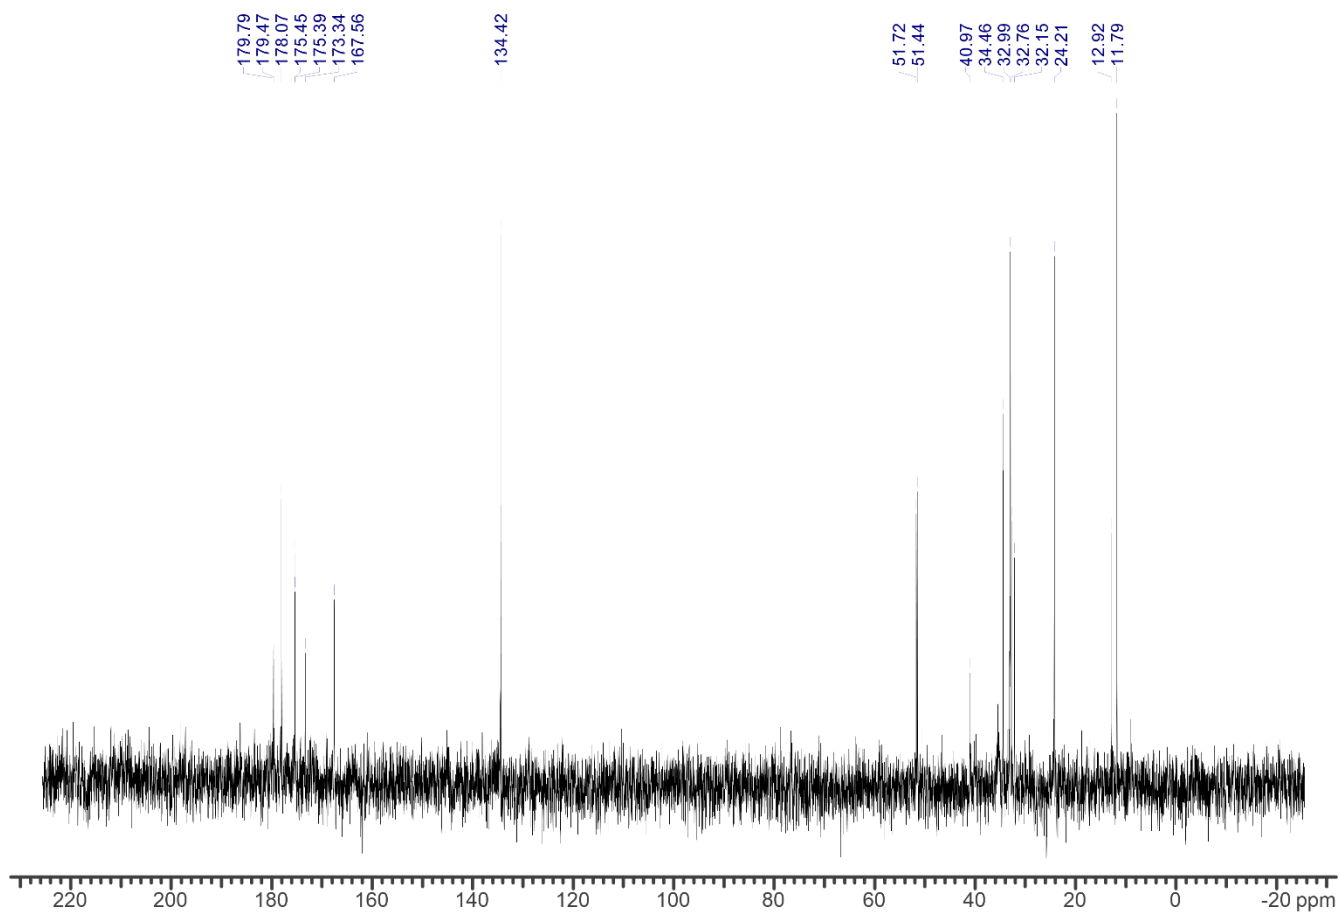

**Figure S4.**  $^{13}\text{C}$  NMR spectrum of the product in  $\text{D}_2\text{O}$  for the model reaction between the cross-linker DCH and *N*-ethylmaleimide.

**Movie S1.** Degradation behavior of tetraPEG-gel containing DCH units in 5 wt% NaClO aqueous solution.

**Movie S2.** Degradation behavior of tetraPEG-gel containing DCH units in 1 wt% NaClO aqueous solution.

**Table S1.** The degradation behavior of cylindrical tetraPEG gel containing DCH units in diluted NaClO solutions below 0.025 wt%.

| Run | NaClO concentration<br>( $10^{-3}$ wt%) | NaClO<br>dilution rate | Result                              |
|-----|-----------------------------------------|------------------------|-------------------------------------|
| 1   | 25                                      | ×200                   | solution (> 12 h)                   |
| 2   | 12.5                                    | ×400                   | solution (> 12 h)                   |
| 3   | 6.25                                    | ×800                   | solution (> 12 h)                   |
| 4   | 3.125                                   | ×1600                  | no bulk degradation (up to 10 days) |
| 5   | 1.563                                   | ×3200                  | no bulk degradation (up to 10 days) |
| 6   | 0.781                                   | ×6400                  | no bulk degradation (up to 10 days) |
| 7   | 0                                       | (control)              | no bulk degradation (up to 10 days) |
